# Supplementary material
Source: PubMed Central journal article supplement (PMC10349034)
Supplement: NIHMS1886119-supplement-supplemental_table.pdf [file NIHMS1886119-supplement-supplemental_table.pdf]

**Chart 1.0 : Monitoring chart**

| <b>Session</b> | <b>Date</b> | <b>Intervention</b> | <b>Delivered or not<br/>(Mark with <input type="checkbox"/>)</b> | <b>PHQ-9<br/>Score</b> | <b>Remarks</b> |
|----------------|-------------|---------------------|------------------------------------------------------------------|------------------------|----------------|
| 1              |             | Psycho- education   |                                                                  |                        |                |
| 2              |             | Relaxation exercise |                                                                  |                        |                |
| 3              |             | Health Promotion    |                                                                  |                        |                |
|                |             | Follow Up           |                                                                  |                        |                |
